# Supplementary material for: Genetic Diagnosis Spectrum and Multigenic Burden of Exome-Level Rare Variants in a Childhood Epilepsy Cohort
Source: Front Genet. 2021 Dec 21;12:782419. doi: 10.3389/fgene.2021.782419 (PMC8725238; doi:10.3389/fgene.2021.782419)
Supplement: Supplementary file 3 [file Table4.XLSX]

## Sheet: Sheet1
Supplemental table 4: Enrichment frequency of exome-level MIS30 and LGD variants in different patient groups
Gene list	Variant type	Control cohort			Monogenic cohort			Negative-diagnosed cohort
		Relative frequency	95%CI		Relative frequency	95%CI		Relative frequency	95%CI
Cell Growth	LGD	1.818	(1.613, 2.023)		1.051	(0.75, 1.352)		0.985	(0.684, 1.286)
	MIS30	0.68	(0.375, 0.985)		0.345	(0.044, 0.646)		0.723	(0.422, 1.024)
Ion Channel	LGD	1.926	(1.728, 2.124)		3.555	(2.981, 4.129)		2.404	(1.416, 3.392)
	MIS30	1.576	(1.378, 1.774)		1.185	(0.952, 1.418)		3.846*	(3.613, 4.079)
Metabolic	LGD	4.284	(4.161, 4.407)		3.985	(3.089, 4.881)		3.662	(2.766, 4.558)
	MIS30	0.571	(0.448, 0.694)		0.684	(0.482, 0.886)		0.596	(0.394, 0.798)
Regulatory	LGD	0.226	(0.168, 0.284)		0.209	(0.124, 0.294)		0.313	(0.228, 0.398)
	MIS30	0.679	(0.621, 0.737)		0.795	(0.691, 0.899)		0.94	(0.836, 1.044)
Synaptic	LGD	3.532	(2.652, 4.412)		3.076	(1.519, 4.633)		3.784	(2.727, 4.841)
	MIS30	0.717	(0.437, 0.997)		0.648	(0.377, 0.919)		1.863*	(1.592, 2.134)
